# 1 Simultaneous development and periodic clustering of simple and 2 complex cells in visual cortex

3

4 **Gwangsu Kim<sup>1</sup>, Jaeson Jang<sup>2</sup>, and Se-Bum Paik<sup>2,3</sup>\***

5 <sup>1</sup>Department of Physics, <sup>2</sup>Department of Bio and Brain Engineering, <sup>3</sup>Program of Brain and Cognitive  
6 Engineering, Korea Advanced Institute of Science and Technology, Daejeon 34141, Republic of Korea

7 \*email: [sbpaik@kaist.ac.kr](mailto:sbpaik@kaist.ac.kr)

8

## 9 **Abstract**

10 Neurons in the primary visual cortex (V1) are often classified as simple or complex cells, but it is debated  
11 whether they are discrete hierarchical classes of neurons developing sequentially, or if they represent a  
12 continuum of variation within a single class of cells developing simultaneously. Herein, we show that simple  
13 and complex cells may arise simultaneously from the universal process of retinal development. From  
14 analysis of the cortical receptive fields in cats, we show evidence that simple and complex cells originate  
15 from the periodic variation of ON-OFF segregation in the feedforward projection of retinal mosaics, by which  
16 they organize into periodic clusters in V1. Our key prediction that clusters of simple and complex cells  
17 correlate topographically with orientation maps was confirmed by data in cats. Our results suggest that  
18 simple and complex cells are not two distinct neural populations but arise from common retinal afferents,  
19 simultaneous with orientation tuning.

20

21

## 22 **Highlights**

- 23 • Simple and complex cells arise simultaneously from retinal afferents.
- 24 • Simple/complex cells are organized into periodic clusters across visual cortex.
- 25 • Simple/complex clusters are topographically correlated with orientation maps.
- 26 • Development of clustered cells in V1 is explained by the Paik-Ringach model.

## 27 **Introduction**

28 Neurons in the primary visual cortex (V1) are often classified as simple or complex cells<sup>1</sup> by their  
29 characteristic organization of spatial receptive fields and the temporal dynamics of their response to stimuli.  
30 In traditional classifications, simple cells have segregated ON/OFF sub-regions of receptive fields and  
31 generate highly modulated sinusoidal response ( $F_1/F_0 > 1$ ) to drifting gratings stimuli, while complex cells  
32 have largely overlapping ON/OFF sub-regions and generate weak modulation of response ( $F_1/F_0 < 1$ , Fig.  
33 1a)<sup>1-7</sup>. As suggested in the pioneering study of Hubel and Wiesel, simple and complex cells have often  
34 been considered to imply a hierarchically distinct functional architecture for visual processing<sup>1,8-11</sup>, so that  
35 simple cells pool thalamic inputs<sup>12,13</sup>, while complex cells then pool inputs from the simple cells (Fig. 1b)<sup>14,15</sup>.

36 Although the conventional hierarchical model predicts that neurons in the early layer are mostly  
37 simple cells<sup>1,10</sup> (Fig. 1c, top), it was observed that complex cells coexist with simple cells in layer 4 of  
38 monkey V1<sup>16</sup>, the earliest cortical stage that receives direct feedforward inputs from the thalamus (Fig. 1c,  
39 bottom; see Supplementary Fig. 2 for cats<sup>9</sup> and tree shrews<sup>17</sup>), implying that simple and complex cells may  
40 arise simultaneously from a common origin. It was also reported that simple- and complex-like receptive  
41 fields can arise together in the primary auditory cortex, when retinal afferents are rewired to give inputs to  
42 the auditory thalamus<sup>18</sup>. This result suggests that feedforward afferents can induce both simple and  
43 complex cells from common retinal afferents.

44 Furthermore, subsequent studies have raised the possibility that simple and complex neurons are  
45 not clearly distinct populations but might be variations within a continuous spectrum<sup>19-21</sup>. Experimental  
46 evidence supporting this notion has been reported—conventional criteria for distinguishing simple and  
47 complex cells are susceptible to stimulus modulation<sup>22-24</sup> and nonlinearity of the spike threshold might be  
48 a prime determinant for simple and complex classes<sup>25</sup>. Thus, these results raise questions on the origin of  
49 simple and complex cells: Might simple and complex cells arise from non-distinctive neural circuits? If so,  
50 then what possible mechanism is there for the development of such a functional variation?

51 Recent studies on the retinal origin of cortical tunings provide clues regarding the wiring of simple  
52 and complex tunings in the early layer of visual cortex<sup>26-28</sup>. A number of studies have reported evidence to

53 strengthen the role of ON/OFF retinal afferents in developing diverse functional tuning of neurons in V1.  
54 For example, the orientation preference of a cortical column can be predicted by the local arrangement of  
55 ON/OFF afferents<sup>29,30</sup> and other functional tunings such as direction selectivity<sup>31</sup>, ON/OFF polarity, and  
56 ocular dominance<sup>32</sup> are observed to develop from the integration of thalamic inputs. Considering that local  
57 thalamic receptive fields preserve those of retinal ganglion cells (RGC), all these results support the notion  
58 that the spatial distribution of ON/OFF receptive fields in retinal mosaics determine the formation of  
59 orientation tuning and their topographic organization<sup>26,27,33–35</sup>.

60 Here, we propose that the simple and complex tuning of V1 neurons arises from the periodic  
61 variation of a common retinal mosaics structure, topographically correlated with the orientation tuning of  
62 underlying neurons. From the analysis of data in cats<sup>32</sup>, we show evidence that neuronal variation from  
63 simple to complex cells can be predicted from the segregation between local ON and OFF feedforward  
64 afferents. Importantly, systematic formation of distinct clusters of simple and of complex cells was observed  
65 across V1, the spatial period of which was matched to that of underlying orientation maps. We also show  
66 that the Paik-Ringach model<sup>26,27</sup> provides a plausible developmental mechanism for the observed results,  
67 implying that simple/complex tuning and orientation selectivity may have a common origin. Our further  
68 prediction that pinwheels on the orientation map and clusters of simple/complex tuning are topographically  
69 correlated, was validated by the analysis of cat data.

70 Overall, our findings suggest that simple and complex cells in V1 develop simultaneously from  
71 structured inputs from the retina, which enables a parallel architecture of the simple and complex tuning in  
72 V1 that is tightly correlated with the topography of other functional maps.

73

## 74 **Results**

### 75 **Simple and complex cells from the spatial arrangement of ON/OFF retinal afferents**

76 Based on the theory that functional tuning in the visual cortex originates from the afferent of ON and OFF  
77 RGC mosaics<sup>26,27,33–35</sup>, we hypothesized that both simple and complex cells in V1 are initially seeded by  
78 the local projection of feedforward afferents, and that the variation of cell types in development is dependent

79 on the spatial distribution of ON and OFF receptive fields imprinted in RGC mosaics (Fig. 2a). We  
80 introduced our model idea by investigating the profile of retinal mosaics data of ON-center and OFF-center  
81 receptive fields (RFs, Fig. 2b)<sup>36</sup>. As previously reported<sup>36,37</sup>, the nearest neighbor distance between different  
82 types of RF centers ( $d_{ON-OFF}$ ) appeared smaller than that between the same type (average of  $d_{ON-ON} = 116$   
83  $\mu\text{m}$  and  $d_{OFF-OFF} = 106 \mu\text{m}$ ), thus the nearest neighbor of an ON cell appears to be an OFF cell, and vice  
84 versa. The profile of this ON-OFF distance ( $d_{ON-OFF}$ ) measured from RGC mosaics data<sup>36</sup> showed a wide  
85 variation, well fitted to a Gaussian distribution (mean = 56.4  $\mu\text{m}$ , standard deviation = 14.3  $\mu\text{m}$ ,  $R^2 = 0.91$ )  
86 (Fig. 2b, bottom histogram).

87 Our main hypothesis is that this spatial organization of ON and OFF RGC can constrain the tuning  
88 of the connected V1 neurons as either simple or complex cells, via statistical wiring from the retina to  
89 V1<sup>26,27,33-35</sup>. When the distance between ON and OFF RGC is large (Fig. 2c, green circle,  $d_{ON-OFF} = 87 \mu\text{m}$ ,  
90 top 12%), a V1 neuron that receives retinal afferents from these local ON and OFF RGCs has a receptive  
91 field of weakly overlapping ON and OFF sub-regions. This results in a high simpleness index (SI, 0.42, see  
92 Methods), representing simple cell-like segregation between ON/OFF subregions. In contrast, when the  
93 distance between ON and OFF RGCs is small (Fig. 2c, purple circle,  $d_{ON-OFF} = 23 \mu\text{m}$ , bottom 5%), the  
94 inputs to V1 generate the receptive field of highly overlapping ON and OFF sub-regions with low SI (0.15),  
95 like a complex cell. In this scenario, the simple/complex tuning in V1 is simply destined from variation of the  
96 local arrangement of ON and OFF RGC mosaics.

97 Our model showed that variation of the response modulation ratio can be determined by the  
98 distance between ON and OFF subregions of RF. This involves  $F_1/F_0$ , the ratio of the first harmonic  
99 component to the mean elevation of the neuronal response to a drifting sinusoidal grating stimulus, another  
100 indicator of simple ( $F_1/F_0 > 1$ ) or complex ( $F_1/F_0 < 1$ ) cells. Based on the spike rectification model<sup>20,25</sup>, a  
101 nonlinear sigmoidal transfer function between the ON-OFF distance of RF and the  $F_1/F_0$  of neural response  
102 was obtained analytically (Fig. 2d, see Supplementary Information and Supplementary Fig. 1 for details).  
103 From this result, we confirmed that the unimodal distribution of the ON-OFF distance shown in Fig. 2b can  
104 generate bimodal segregation of  $F_1/F_0$  observed in the data (Fig. 2e).

105

## 106 **Periodic spatial organization of simple/complex cells**

107 One important prediction arises from the result above: the spatial organization of simple and complex cells  
108 across a cortical layer would reflect the spatial layout of the  $d_{ON-OFF}$  in the RGC mosaic, organization into  
109 topographical clusters. As shown in Fig. 2f, the spatial distribution of  $d_{ON-OFF}$  is clustered across the RGC  
110 mosaics (Fig. 2f, top), generating local regions of large or small  $d_{ON-OFF}$  values. According to our model, it is  
111 predicted that simple and complex cells in V1 must appear as an organization of clusters across the cortical  
112 surface (Fig. 2f, bottom).

113 To test this idea, spatial organization of simple and complex cells in V1 was examined using  
114 published receptive field data<sup>32</sup> obtained by multielectrode recording in cats (Fig. 3a). From the observed  
115 ON and OFF receptive fields, the simple/complex tuning index (SI) and the distance between ON/OFF  
116 center of mass ( $d_{ON-OFF}$ ) of each recording site were measured (Fig. 3b). The recording data contained both  
117 simple- and complex-like receptive fields, which showed segregated (left) or overlapped (right) ON and  
118 OFF sub-regions respectively. As reported<sup>32</sup>, the distribution of orientation preference varied periodically  
119 (Fig. 3c, top). Interestingly, both the spatial variation of  $d_{ON-OFF}$  and SI in V1 appeared periodically clustered  
120 along the cortical penetrations. The distribution of  $d_{ON-OFF}$  (Fig. 3c, 3<sup>rd</sup> row) was well-fitted to a sinusoidal  
121 function of  $\sim 1.1$  mm period. Comparable to this, the distribution of SI (Fig. 3c, bottom) was also fitted to a  
122 sinusoidal function of nearly identical spatial period ( $\sim 1.0$  mm) and phase (phase difference  $\sim 17^\circ$ ). We found  
123 that the value of the observed SI and  $d_{ON-OFF}$  was tightly correlated as predicted by the model ( $n = 52$  data  
124 points from 2 penetrations, Pearson correlation coefficient,  $r = 0.66$ ,  $p = 1.2 \times 10^{-7}$ ).

125 More interestingly, the spatial organization of  $d_{ON-OFF}$  and SI were correlated with orientation  
126 preference, and had a common period identical to that of the orientation tuning. For direct comparison,  
127 orientation preference ( $\theta$ ) was transformed into  $\cos(2\theta + \Phi)$  (Fig. 3c, 2<sup>nd</sup> row), and was shifted to find the  
128 maximum correlation (Supplementary Fig. 3). As shown in Figure 3d, the values of  $d_{ON-OFF}$  (or SI) and the  
129 cosine of orientation preference were correlated across cortical surface (Fig. 3d,  $n = 46$  data points from 2  
130 penetrations). Furthermore, the remarkably similar clustering period among the three organizations was

131 manifested in the average absolute pairwise difference for each measure (orientation,  $d_{ON-OFF}$ , and SI)  
132 plotted as a function of cortical distance (Fig. 3e, averaged over the 2-penetration data sets, where each  
133 mean value includes more than 20 pairwise comparisons). The calculated mean period values (orientation  
134 1.1 mm,  $d_{ON-OFF}$  1.0 mm, SI 1.1 mm) were not only similar to each other, but also matched the previously  
135 reported values of period of orientation maps in cats<sup>38</sup> (Fig. 3f).

136

### 137 **Periodic clustering of simple/complex neurons from RGC mosaics**

138 The observed periodic organization of simple/complex neurons, and their consistent period with the  
139 orientation preference, suggest that a common organizing principle may exist for tiling of both simple and  
140 complex tuning of neurons and their orientation tuning. Previously, theoretical studies suggested that  
141 topographic organization of various neural tunings may arise commonly from the spatial organization of  
142 RGC mosaics<sup>26,28,33-35</sup> and recent observations reported that cortical orientation preference can be  
143 predicted by the spatial arrangement of ON and OFF afferents<sup>30,32</sup>, providing evidence for retinal origin of  
144 the cortical tunings. In addition to these findings, here we show that the observed clustering of  
145 simple/complex tuning is predicted and explained by the retinal development model proposed by Paik and  
146 Ringach<sup>26,27</sup>. In this model, two noisy hexagonal lattices of ON and OFF RGC mosaics generate a periodic  
147 interference pattern of a local ON-OFF dipole-like arrangement, called a moiré interference pattern (Fig. 4a,  
148 top). In this interference pattern, the ON-OFF distance and ON-OFF dipole angle changes periodically  
149 across the mosaics, with their spatial period denoted as  $\lambda_m$ . As suggested in previous model studies<sup>34,35</sup>, we  
150 assumed that the response of a local V1 neuron is constrained by the structure of ON/OFF afferents from  
151 the RGC mosaics (Fig. 4a, bottom). In this scenario, orientation tuning is determined by the alignment angle  
152 of the ON and OFF RGCs, and the SI of a V1 neuron is determined by the segregation between ON and  
153 OFF RGCs of corresponding afferents.

154 The model predicts that the preferred orientation,  $d_{ON-OFF}$ , and SI, of V1 neurons are organized into  
155 a spatial cluster of the same period,  $\lambda_m$ , and our model simulation results support this prediction (Fig. 4b,

156 see methods for details). All three of the simulated maps showed clear periodic clustering of tuning across  
157 the cortical surface, matching the periodic organization of the RGC interference pattern. As in the data,  
158 cortical profiles of  $d_{ON-OFF}$  and SI in the model showed strong correlation with the cosine of the orientation  
159 preference (Fig. 4c). Furthermore, the period of each map, calculated from average pairwise difference as  
160 a function of pairwise distance, was identical to the predicted period  $\lambda_m$  of the retinal moiré interference  
161 (Supplementary Fig. 4). The distribution of the obtained period values of orientation,  $d_{ON-OFF}$ , and SI from  
162 different locations of the model map were statistically indistinguishable from each other (Fig. 4d). These  
163 results imply that our retinal development model could explain the origin of correlated clustering of  
164 orientation preference and simple/complex tuning in V1.

165

#### 166 **Prediction of local simple/complex tuning from information on local orientation tuning**

167 Extension of the previous analysis of a correlated organization of simple/complex and orientation tuning  
168 motivated us to ask whether information on the local structure of an orientation map could predict the local  
169 simple/complex tuning of neurons in the corresponding local area. From the simulated maps of orientation  
170 and simple/complex tuning from a set of retinal mosaics, our model predicted that the locations of pinwheels  
171 are likely to be either maxima or minima of local simple/complex tuning, or SI (Fig. 5a). A previous study<sup>27</sup>  
172 reported that two types of pinwheels of opposite polarity are generated from two distinct types of singularity  
173 of retinal interference patterns (see Fig. 1 in Paik and Ringach, 2012, for details). According to our model,  
174 these two singularities match the locations where ON-OFF RGC distance is either maximal or minimal,  
175 respectively. Thus, the model predicts spatial overlap of pinwheels of orientation maps and clusters of  
176 simple/complex cells: that is; the SI measured at each pinwheel location must be significantly higher or  
177 lower than that measured at other random locations.

178 To quantify this model prediction, we measured pinwheel locations on the simulated orientation  
179 maps, using the local homogeneity index (LHI, see Methods) minimized near pinwheels<sup>39,40</sup>. Then, SI values  
180 were measured near the center of each type of pinwheel (circular area within 1/8 map period). Those

181 averaged SI values at each type of pinwheel were significantly higher or lower than the average SI at other  
182 random locations (Fig. 5b,  $*p < 0.0001$ , Wilcoxon rank-sum test). Thus, the model predicts “simple  
183 pinwheels” and “complex pinwheels” where SI values are local maxima or minima, respectively.

184 As the model predicted, we found evidence in the data that SI values are either maxima or minima  
185 at pinwheel locations. Similar to the model analysis above, 1-D LHI profiles were obtained from the  
186 orientation preference of recording data (Fig. 5c, from 2 penetrations). Although identification of the  
187 pinwheel polarity was not possible in this dataset due to the dimensions of the recordings, we found that  
188 the data contained three cortical locations where LHI values were locally minimized, implying that the  
189 recording passed near pinwheels. We identified these three locations of minimal LHI as tentative pinwheel  
190 locations (black arrows, PW1, PW2, and PW3) and found that the detected local maxima or minima of SI  
191 (triangles) were located close (within 100  $\mu\text{m}$ ) to the three tentative pinwheel locations. To quantify further  
192 this correlated architecture, we calculated average SI values of neighboring electrodes (within 100  $\mu\text{m}$ ) at  
193 each LHI minimum. The local SI values near pinwheels (LHI minima) were significantly higher (PW1, PW2)  
194 or lower (PW3) than those at other recording sites (Fig. 5d, red bars,  $*p = 0.0065, 0.027, \text{ and } 0.016$  for  
195 PW1, PW2, and PW3, Wilcoxon rank-sum test). This result suggests that our model can exploit the  
196 information of orientation map topography to predict the local simple/complex tunings, further supporting  
197 the validity of the model.

198

## 199 **Discussion**

200 Our findings suggest that simple and complex tuning in V1 can commonly originate from spatial  
201 arrangement of the local projection of retinal afferents. Analysis of multielectrode recording data from cats  
202 revealed that simple and complex cells are periodically clustered in V1. This is the first report that simple  
203 and complex tunings are topographically organized in V1. Moreover, the observed periodic organization  
204 has a period consistent with the orientation preference, implying the common origin of the simple/complex  
205 cells and the orientation tuning in V1. The Paik-Ringach model predicts and explains the essential features



206 of the observed periodicity from the periodic projection of retinal afferents imprinted in retinal mosaics. We  
207 further demonstrated that local orientation map topography and the local simple/complex tuning properties  
208 are correlated in a manner consistent with the model prediction.

209 In addition to afferent circuits, intracortical circuits can also contribute to the modulation in the  
210 simple/complex tuning within V1 as suggested in previous studies<sup>19,21,22</sup>. Indeed, our results do not rule out  
211 the possible role of intracortical activities after the initial tuning is constrained by the afferent inputs. However,  
212 from the observation that several experimental actions, such as silencing intracortical activity, did not  
213 change the orientation selectivity of V1 neurons due to thalamic inputs<sup>41-43</sup>, and that the arrangement of  
214 thalamic inputs can predict diverse tuning properties<sup>30,32</sup>, it is reasonable to suggest that the effect of  
215 intracortical inputs would be less influential to the initial development of simple and complex tuning than the  
216 effect of afferent inputs. Moreover, our results regarding the periodic spatial organization of simple and  
217 complex cells were predicted by the retinal afferent model<sup>26</sup>, which strengthens the view that major tuning  
218 properties of V1 neurons are anchored by retinal afferents, and that intracortical circuits refine or diversify  
219 a degree of tuning that the afferent circuits cannot solely develop<sup>43</sup>. The correlated architecture of  
220 simple/complex properties and the orientation map suggests further systematic combination of  
221 simple/complex tuning and other functional tunings in the thalamo-recipient layer of V1. Our model  
222 simulation and data analysis revealed that variation of simple/complex tuning is systematically tiled in  
223 relation to the underlying geometry of the orientation tuning, implying that the various feature selectivities  
224 in V1 are efficiently combined via systematic rules between functional maps<sup>39,44-47</sup>.

225 One might argue that the ratio between simple and complex cells in layer 4 is not consistent but  
226 instead is fairly different across species. For example, layer 4 of cat V1 is more dominated by simple cells<sup>9</sup>,  
227 while more complex cells are observed than simple cells in monkey V1<sup>16</sup>. Because a simple/complex tuning  
228 index could be modulated by intracortical activity<sup>22</sup> or cortical nonlinearity<sup>25</sup>, difference of such parameters  
229 across species could elicit shifting of the distribution. More importantly, however, the tendency that both  
230 simple and complex cells develop simultaneously in the earliest hierarchy of visual cortex is commonly  
231 observed, which is consistent with our model prediction of retinal origin of simple and complex cells in V1.

232 The results of several studies suggest that simple cells are mostly observed in the earliest layer of V1<sup>48,49</sup>,  
233 and that the proportion of complex cells becomes greater as the layers get deeper<sup>9</sup>. These observations  
234 are not different from our model prediction, because projection from an input layer of V1, especially layer 4,  
235 will converge into a superficial layer, such as layer 2/3, to generate more complex receptive fields. Rather,  
236 our finding suggests that the architecture of V1 is not only hierarchical but also parallel, and this parallel  
237 architecture refines the classical notion of visual cortex. That is, the role of simple/complex cells in visual  
238 information processing is not restricted to distinguishing different stages of the cortical microcircuits, but  
239 can be regarded as an element of functional diversity in the same cortical layer.

240 To sum up, the observed periodic spatial organization of simple and complex cells provides a  
241 population-level clue regarding how simple and complex receptive fields are generated and leads to the  
242 view that the distance between ON and OFF retinal afferents provides the source of the simple/complex  
243 spectrum. Complementary to the classical notion that simple and complex cells are hierarchically distinct,  
244 the observed periodic spatial organization of simple/complex cells shows systematic variation in the earliest  
245 layer in V1 that receives thalamic inputs. That the period is consistent with that of the orientation preference  
246 encourages the view that structured retinal afferents designed by interference between ON and OFF RGC  
247 mosaics provide the common source of both orientation preference and the simple/complex-property of the  
248 connected V1 neurons. These results support the theory that the diverse functional tunings of V1 are  
249 determined by the arrangement of ON/OFF afferent inputs of retinal origin.

250

251 **Methods**

252 **Simpleness index (SI)** To quantify the simple/complex tuning of the receptive field, we calculated the  
253 simpleness index (SI), which represents the degree of segregation between ON/OFF subregions<sup>5,17,30,50</sup>.

254 The SI is defined as follows:

$$255 \quad SI = \frac{\sum |RF_{OFF} - RF_{ON}|}{\sum |RF_{OFF} + RF_{ON}|}$$

256 Where  $RF_{OFF}$  and  $RF_{ON}$  represent 2-d matrices of ON and OFF receptive field subregions, respectively, and  
257 the summation is over all matrix elements.

258

259 **Analysis of RGC mosaics** The ON-OFF dipole was defined as a line connecting the nearest ON cell  
260 from each OFF cell in the mosaic. The map of  $d_{ON-OFF}$  in Fig. 2f was obtained as,

$$261 \quad d_{ON-OFF}(\mathbf{r}) = \sum_i d_{ON-OFF,i} * \exp\left(-\frac{|r - r_{dipole,i}|^2}{2\sigma_r^2}\right),$$

262 where  $r_{dipole,i}$  and  $d_{ON-OFF,i}$  are the center and size of the  $i^{th}$  dipole, respectively ( $\sigma_r = 116 \mu\text{m}$ , average nearest  
263 distance between OFF cells). After the above calculation, the map was linearly rescaled to match the  
264 minimum and maximum value of the original  $d_{ON-OFF}$  values. The SI values in Figure 2 were calculated by  
265 assuming that a model V1 neuron receives inputs from one ON-center RGC and one OFF-center RGC of  
266 equal strength. The receptive field of ON- and OFF-center RGCs were modeled as the difference of a  
267 Gaussian ( $\sigma_{surround} = 3\sigma_{center}$ ,  $\sigma_{center, ON/OFF} = \text{half of the average ON-ON/OFF-OFF distance, respectively}$ ). The  
268 map of SI in Fig. 2f was obtained as the same formula for  $d_{ON-OFF}$ .

269

270 **Receptive field data** Spatial organization of simple/complex cells in V1 was analyzed using published  
271 receptive field data obtained by multielectrode recording in Layer 4 of cat V1. This was provided by Jose-  
272 Manuel Alonso via data presented in Figure 2 of a previous study<sup>32</sup>. The detailed experimental procedures  
273 for mapping receptive fields are described in the reference.

274 We defined the size of the receptive field ( $r$ ) for each recording as the average radius of receptive  
275 fields within each penetration (assuming circular receptive fields). The distance between the center of mass

276 of ON and OFF subfields were normalized by dividing that distance by  $r$ . The period of each distribution (SI,  
277  $d_{ON-OFF}$ , and orientation preference) was calculated as the distance at which the pairwise difference value  
278 (Fig. 3f) reaches its minimum among local minima of the curves, following the process to calculate the  
279 period of orientation preference in the reference<sup>32</sup>.

280

281 **Analysis of homogeneity of the organization of orientation preference** To quantify the degree of  
282 homogeneity of the organization of orientation preference at a specific location  $x_i$ , we calculated the local  
283 homogeneity index (LHI) with window size  $\sigma$  (170  $\mu\text{m}$ ) as follows<sup>40</sup>:

284 
$$LHI(x_i) = \left| \frac{1}{k} * \sum_j \exp\left(-\frac{(x_i - x_j)^2}{2\sigma^2}\right) * \exp(i * 2\theta_j) \right|$$

285 where  $j$  represents each site in the penetration,  $k$  is a normalization constant that makes the theoretical  
286 maximum value of LHI = 1, and  $\theta_j$  is the preferred orientation of the  $j^{\text{th}}$  site. To avoid the edge effect in  
287 calculating the LHI, two sites at either end of the recordings were not represented. To obtain the LHI of the  
288 model orientation map, the same formula with the same window size (the sizes of model and data were  
289 normalized to match the period) was applied to two-dimensional space<sup>39</sup>. The location of pinwheels was  
290 identified as local minima of LHI that were smaller than the quartile.

291

292 **Map simulation** The simulations were conducted based on the statistical wiring model published  
293 earlier<sup>26,34,35</sup>. Here, we summarize the algorithm and parameters that were used to produce the results.

294

295 **Generation of retinal ganglion cell mosaics** The ON and OFF RGC mosaics used in the simulation  
296 were generated by adding random spatial noise to each node of the hexagonal lattices that represent the  
297 position of the center of ON-center and OFF-center receptive fields, respectively. The position vectors of  
298 the centers of the receptive fields were defined as

299 
$$\mathbf{x}_{ij,OFF} = d * \mathbf{H}_{ij} + \boldsymbol{\eta}_{ij}$$

300 
$$\mathbf{x}_{ij,ON} = (1 + \alpha)d * \mathbf{H}_{ij} + \boldsymbol{\eta}_{ij}$$

301 where  $d$  represents the lattice constant of the OFF mosaic,  $(1+\alpha)d$  represents the lattice constant of the ON  
302 mosaic ( $\alpha = 1/7$ ),  $\eta_{ij}$  represents the 2-D additive Gaussian noise with a standard deviation  $\sigma (= 0.05d)$ , and  
303  $\mathbf{H}_{ij}$  represents the vectors of the nodes of a unit hexagonal lattice spanned by two basis vectors.

$$304 \quad \mathbf{H}_{ij} = \frac{1}{2} \begin{bmatrix} 1 & 1 \\ \sqrt{3} & \sqrt{3} \end{bmatrix} \begin{bmatrix} i \\ j \end{bmatrix} \quad i, j \in \mathbb{Z}$$

305 The characteristic period of the hexagonal moiré interference pattern,  $\lambda_m$ , is given by<sup>51</sup>

$$306 \quad \lambda_m = \frac{(1 + \alpha)}{\alpha} d$$

307 when the directions of the two principle axes of the lattices match.

308 The main results of the model simulation and comparison with the data is nearly identical to the various  
309 choices of the parameter of the moiré interference.

310

311 **Statistical connectivity and receptive field computation** The mean receptive field at each cortical  
312 site can be computed by the weighted sum of the afferent LGN input (it relays the afferent RGC input).

$$313 \quad \Psi(x, y; \mathbf{x}) = \sum_i \exp(-(\mathbf{x} - \mathbf{x}_i)^2 / 2\sigma_{con}^2) \Psi_{i,LGN}$$

314 where  $\mathbf{x}$  is the cortical site at which we calculate the mean receptive field,  $\mathbf{x}_i$  is the location of the  $i^{th}$  LGN  
315 afferent,  $\Psi_{i,LGN}$  is the receptive field of the LGN afferent, and  $\sigma_{con}$  ( $= 0.28d$ ) is the parameter that determines  
316 the spatial extent of the synaptic weight distribution, which is assumed to be a form of Gaussian<sup>35</sup>.

317

318 **Measurements of cortical maps** Simulated cortical maps were obtained from the computed receptive  
319 fields at each cortical position. The SI of the V1 neurons was calculated in the same way as the SI of the  
320 data. The preferred orientation of each receptive field was calculated as the angle orthogonal to the line  
321 connecting the center of ON and OFF subregions. If either an ON or OFF subregion dominated (so called  
322 “monocontrast” cells, which respond to only one particular sign of contrast), so that the sum of all the  
323 weights of ON afferents were larger than two times the sum of all the weights of OFF afferents and vice  
324 versa, the neurons were excluded from the map measurement. After obtaining the SI and orientation  
325 preference of each cortical site, we smoothed the map with a 2-D Gaussian kernel with standard

326 deviation  $0.16 \lambda_m$ . The filtered map of SI and  $d_{ON-OFF}$  were linearly rescaled to recover the minimum and  
327 maximum values of the raw cortical maps.

328 To compare the data and model, we obtained pixel-values from cross-sections of each simulated  
329 map along line segments that had the same length as the data segments, but with random penetration  
330 direction. The length of the data and model was normalized to match the period of orientation preference  
331 of the data (1.1 mm) and that of model ( $\lambda_m$ ). As in the data, 27 sites with equal spacing were sampled for  
332 each cross-section (10,000 cross-sections) and pairwise difference curves were calculated. Two pairwise  
333 difference curves were randomly sampled and the mean and standard deviation of the mean of the two  
334 curves were calculated for 100,000 iterations. For pairwise differences of SI and  $d_{ON-OFF}$ , the scale of  
335 variation was normalized by dividing the maximum value of the mean model curve and multiplying by the  
336 maximum value of the data curve.

337

#### 338 **Acknowledgements:**

339 We are grateful to Jose-Manuel Alonso (State University of New York) for sharing receptive field data on  
340 the cat primary visual cortex, via data presented in Figure 2 of his reference<sup>32</sup>. This work was supported by  
341 the National Research Foundation of Korea (NRF) grant funded by the Korea government (MSIT)  
342 (No. NRF-2019R1A2C4069863, NRF-2019M3E5D2A01058328) (to S.P.).

343 **References**

- 344 1. Hubel, D. H. & Wiesel, T. N. Receptive fields, binocular interaction and functional architecture in  
345 the cat's visual cortex. *J. Physiol.* **160**, 106–154 (1962).
- 346 2. Dean, A. F. & Tolhurst, D. J. On the distinctness of simple and complex cells in the visual cortex of  
347 the cat. *J. Physiol.* **344**, 305–325 (1983).
- 348 3. De Valois, R. L., Albrecht, D. G. & Thorell, L. G. Spatial frequency selectivity of cells in macaque  
349 visual cortex. *Vision Res.* **22**, 545–559 (1982).
- 350 4. Skottun, B. C. *et al.* Classifying simple and complex cells on the basis of response modulation.  
351 *Vision Res.* **31**, 1079–1086 (1991).
- 352 5. Mata, M. L. & Ringach, D. L. Spatial overlap of ON and OFF subregions and its relation to  
353 response modulation ratio in macaque primary visual cortex. *J. Neurophysiol.* **93**, 919–928 (2005).
- 354 6. Nowak, L. G., Sanchez-Vives, M. V. & McCormick, D. A. Spatial and Temporal Features of  
355 Synaptic to Discharge Receptive Field Transformation in Cat Area 17. *J. Neurophysiol.* **103**, 677–  
356 697 (2010).
- 357 7. DeAngelis, G. C., Ohzawa, I. & Freeman, R. D. Receptive-field dynamics in the central visual  
358 pathways. *Trends Neurosci.* **18**, 451–458 (1995).
- 359 8. Martinez, L. M. & Alonso, J.-M. Complex Receptive Fields in Primary Visual Cortex. *Neurosci.* **9**,  
360 317–331 (2003).
- 361 9. Martinez, L. M. *et al.* Receptive field structure varies with layer in the primary visual cortex. *Nat.*  
362 *Neurosci.* **8**, 372–379 (2005).
- 363 10. Antolik, J. & Bednar, J. A. Development of Maps of Simple and Complex Cells in the Primary  
364 Visual Cortex. *Front. Comput. Neurosci.* **5**, (2011).
- 365 11. Lehky, S. R., Sejnowski, T. J. & Desimone, R. Selectivity and sparseness in the responses of  
366 striate complex cells. *Vision Res.* **45**, 57–73 (2005).
- 367 12. Ferster, D. & Lindström, S. An intracellular analysis of geniculocortical connectivity in area 17 of  
368 the cat. *J. Physiol.* **342**, 181–215 (1983).
- 369 13. Clay Reid, R. & Alonso, J.-M. Specificity of monosynaptic connections from thalamus to visual  
370 cortex. *Nature* **378**, 281–284 (1995).
- 371 14. Alonso, J.-M. & Martinez, L. M. Functional connectivity between simple cells and complex cells in  
372 cat striate cortex. *Nat. Neurosci.* **1**, 395–403 (1998).
- 373 15. Yu, J. & Ferster, D. Functional Coupling from Simple to Complex Cells in the Visually Driven  
374 Cortical Circuit. *J. Neurosci.* **33**, 18855–18866 (2013).
- 375 16. Ringach, D. L., Shapley, R. M. & Hawken, M. J. Orientation Selectivity in Macaque V1: Diversity  
376 and Laminar Dependence. *J. Neurosci.* **22**, 5639–5651 (2002).
- 377 17. Van Hooser, S. D., Roy, A., Rhodes, H. J., Culp, J. H. & Fitzpatrick, D. Transformation of  
378 Receptive Field Properties from Lateral Geniculate Nucleus to Superficial V1 in the Tree Shrew. *J.*  
379 *Neurosci.* **33**, 11494–11505 (2013).
- 380 18. Roe, A., Pallas, S., Kwon, Y. & Sur, M. Visual projections routed to the auditory pathway in ferrets:  
381 receptive fields of visual neurons in primary auditory cortex. *J. Neurosci.* **12**, 3651–3664 (1992).

- 382 19. Chance, F. S., Nelson, S. B. & Abbott, L. F. Complex cells as cortically amplified simple cells. *Nat.*  
383 *Neurosci.* **2**, 277–282 (1999).
- 384 20. Mechler, F. & Ringach, D. L. On the classification of simple and complex cells. *Vision Res.* **42**,  
385 1017–1033 (2002).
- 386 21. Tao, L., Shelley, M., McLaughlin, D. & Shapley, R. An egalitarian network model for the  
387 emergence of simple and complex cells in visual cortex. *Proc. Natl. Acad. Sci.* **101**, 366–371  
388 (2004).
- 389 22. Bardy, C., Huang, J. Y., Wang, C., FitzGibbon, T. & Dreher, B. ‘Simplification’ of responses of  
390 complex cells in cat striate cortex: suppressive surrounds and ‘feedback’ inactivation. *J. Physiol.*  
391 **574**, 731–750 (2006).
- 392 23. Crowder, N. A., van Kleef, J., Dreher, B. & Ibbotson, M. R. Complex Cells Increase Their Phase  
393 Sensitivity at Low Contrasts and Following Adaptation. *J. Neurophysiol.* **98**, 1155–1166 (2007).
- 394 24. Fournier, J., Monier, C., Pananceau, M. & Frégnac, Y. Adaptation of the simple or complex nature  
395 of V1 receptive fields to visual statistics. *Nat. Neurosci.* **14**, 1053–1060 (2011).
- 396 25. Priebe, N. J., Mechler, F., Carandini, M. & Ferster, D. The contribution of spike threshold to the  
397 dichotomy of cortical simple and complex cells. *Nat. Neurosci.* **7**, 1113–1122 (2004).
- 398 26. Paik, S. B. & Ringach, D. L. Retinal origin of orientation maps in visual cortex. *Nat. Neurosci.* **14**,  
399 919–925 (2011).
- 400 27. Paik, S.-B. & Ringach, D. L. Link between orientation and retinotopic maps in primary visual  
401 cortex. *Proc. Natl. Acad. Sci.* **109**, 7091–7096 (2012).
- 402 28. Jang, J. & Paik, S.-B. Interlayer Repulsion of Retinal Ganglion Cell Mosaics Regulates Spatial  
403 Organization of Functional Maps in the Visual Cortex. *J. Neurosci.* **37**, 12141–12152 (2017).
- 404 29. Jin, J., Wang, Y., Swadlow, H. A. & Alonso, J. M. Population receptive fields of ON and OFF  
405 thalamic inputs to an orientation column in visual cortex. *Nat. Neurosci.* **14**, 232–238 (2011).
- 406 30. Lee, K.-S., Huang, X. & Fitzpatrick, D. Topology of ON and OFF inputs in visual cortex enables an  
407 invariant columnar architecture. *Nature* **533**, 90–94 (2016).
- 408 31. Lien, A. D. & Scanziani, M. Cortical direction selectivity emerges at convergence of thalamic  
409 synapses. *Nature* **558**, 80–86 (2018).
- 410 32. Kremkow, J., Jin, J., Wang, Y. & Alonso, J. M. Principles underlying sensory map topography in  
411 primary visual cortex. *Nature* **533**, 52–57 (2016).
- 412 33. Soodak, R. E. The retinal ganglion cell mosaic defines orientation columns in striate cortex. *Proc.*  
413 *Natl. Acad. Sci. U. S. A.* **84**, 3936–3940 (1987).
- 414 34. Ringach, D. L. Haphazard wiring of simple receptive fields and orientation columns in visual  
415 cortex. *J. Neurophysiol.* **92**, 468–476 (2004).
- 416 35. Ringach, D. L. On the Origin of the Functional Architecture of the Cortex. *PLoS One* **2**, e251  
417 (2007).
- 418 36. Gauthier, J. L. *et al.* Receptive Fields in Primate Retina Are Coordinated to Sample Visual Space  
419 More Uniformly. *PLoS Biol.* **7**, e1000063 (2009).
- 420 37. Wassle, H., Boycott, B. B. & Illing, R. B. Morphology and mosaic of on- and off-beta cells in the cat  
421 retina and some functional considerations. *Proc. R. Soc. London. Ser. B. Biol. Sci.* **212**, 177–195



- 422 (1981).
- 423 38. Rao, S. C., Toth, L. J. & Sur, M. Optically imaged maps of orientation preference in primary visual  
424 cortex of cats and ferrets. *J. Comp. Neurol.* **387**, 358–370 (1997).
- 425 39. Nauhaus, I., Benucci, A., Carandini, M. & Ringach, D. L. Neuronal selectivity and local map  
426 structure in visual cortex. *Neuron* **57**, 673–679 (2008).
- 427 40. Koch, E., Jin, J., Alonso, J. M. & Zaidi, Q. Functional implications of orientation maps in primary  
428 visual cortex. *Nat. Commun.* **7**, 13529 (2016).
- 429 41. Ferster, D., Chung, S. & Wheat, H. Orientation selectivity of thalamic input to simple cells of cat  
430 visual cortex. *Nature* **380**, 249–252 (1996).
- 431 42. Chung, S. & Ferster, D. Strength and Orientation Tuning of the Thalamic Input to Simple Cells  
432 Revealed by Electrically Evoked Cortical Suppression. *Neuron* **20**, 1177–1189 (1998).
- 433 43. Lien, A. D. & Scanziani, M. Tuned thalamic excitation is amplified by visual cortical circuits. *Nat.*  
434 *Neurosci.* **16**, 1315–1323 (2013).
- 435 44. Swindale, N. V., Shoham, D., Grinvald, A., Bonhoeffer, T. & Hübener, M. Visual cortex maps are  
436 optimized for uniform coverage. *Nat. Neurosci.* **3**, 822–826 (2000).
- 437 45. Kara, P. & Boyd, J. D. A micro-architecture for binocular disparity and ocular dominance in visual  
438 cortex. *Nature* **458**, 627–631 (2009).
- 439 46. Smith, G. B., Whitney, D. E. & Fitzpatrick, D. Modular Representation of Luminance Polarity in the  
440 Superficial Layers of Primary Visual Cortex. *Neuron* **88**, 805–818 (2015).
- 441 47. Obermayer, K. & Blasdel, G. Geometry of orientation and ocular dominance columns in monkey  
442 striate cortex. *J. Neurosci.* **13**, 4114–4129 (1993).
- 443 48. Hirsch, J. a, Gallagher, C. a, Alonso, J.-M. & Martinez, L. M. Ascending Projections of Simple and  
444 Complex Cells in Layer 6 of the Cat Striate Cortex. *J. Neurosci.* **18**, 8086–8094 (1998).
- 445 49. Martinez, L. M., Alonso, J.-M., Reid, R. C. & Hirsch, J. A. Laminar processing of stimulus  
446 orientation in cat visual cortex. *J. Physiol.* **540**, 321–333 (2002).
- 447 50. Dean, B. Y. A. F. & Tolhurst, D. J. On the distinctness of simple and complex cells in the visual  
448 cortex of the cat. *J. Neurophysiol.* **344**, 305–325 (1983).
- 449 51. Blair, H. T., Welday, A. C. & Zhang, K. Scale-Invariant Memory Representations Emerge from  
450 Moire Interference between Grid Fields That Produce Theta Oscillations: A Computational Model.  
451 *J. Neurosci.* **27**, 3211–3229 (2007).
- 452 52. Enroth-Cugell, C. & Robson, J. G. The contrast sensitivity of retinal ganglion cells of the cat. *J.*  
453 *Physiol.* **187**, 517–552 (1966).
- 454 53. Chichilnisky, E. J. A simple white noise analysis of neuronal light responses. *Network-computation*  
455 *Neural Syst.* **12**, 199–213 (2001).
- 456 54. Polsky, A., Mel, B. W. & Schiller, J. Computational subunits in thin dendrites of pyramidal cells.  
457 *Nat. Neurosci.* **7**, 621–627 (2004).

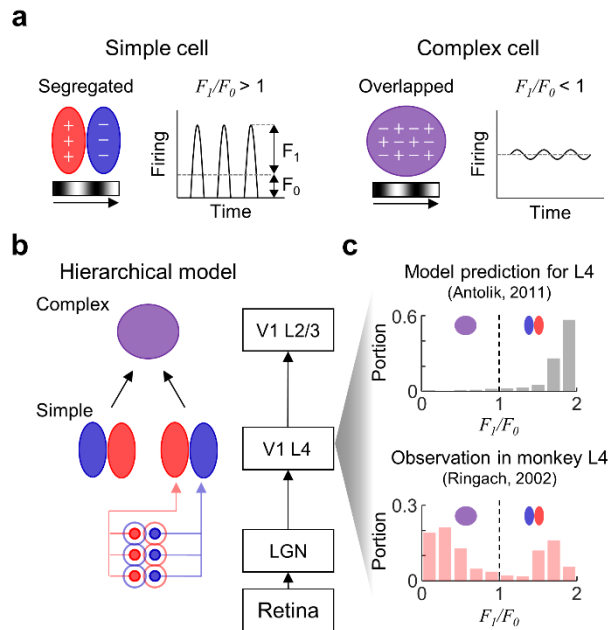

458 **Figure 1. Parallel development of simple and complex cells in the primary visual cortex**

459 (a) Illustration of simple (left) and complex (right) cells. Receptive fields and response profiles to a drifting  
 460 sinusoidal grating stimulus are described. Red area (+): ON subregion. Blue area (-): OFF subregion. Purple  
 461 area (+&-): both ON and OFF subregion.  $F_1/F_0$ : ratio of 1<sup>st</sup> harmonic amplitude to mean elevation of firing  
 462 rate. (b) Schematic of the classical hierarchical model. (c) Bimodal histograms of  $F_1/F_0$  in Layer 4 of adult  
 463 monkeys (red bar, adapted from reference<sup>16</sup>) and prediction of hierarchical model (gray bar, adapted from  
 464 reference<sup>10</sup>).

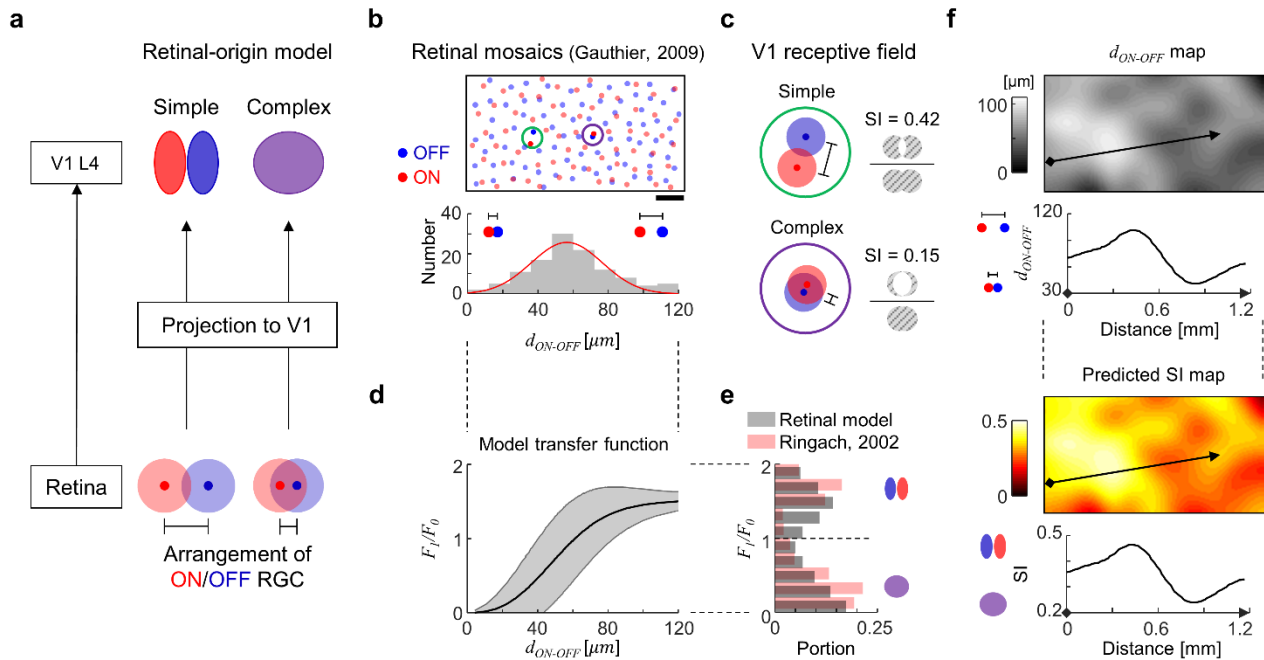

465 **Figure 2. Retinal-origin model of simple and complex cells.**

466 (a) Schematic of retinal-origin model. ON- and OFF- center RGC receptive fields are represented as red  
 467 and blue circles (dots represent the center of mass). (b) ON and OFF-center RGC receptive field mosaic  
 468 data from monkeys<sup>36</sup>. Scale bar: 0.2 mm. ON-OFF dipoles (N = 116) were defined as a line from each OFF  
 469 cell to the nearest ON cell, and  $d_{ON-OFF}$  denotes the size of the dipole. Bottom histogram represents the  
 470 distribution of  $d_{ON-OFF}$ , fitted to a Gaussian (Red curve). (c) Example receptive fields of local ON and OFF  
 471 RGC afferents (from green and purple circles in b). Simplicity index (SI) measures the spatial segregation  
 472 between ON and OFF receptive field sub-regions. (d) A nonlinear transformation between  $F_1/F_0$  and ON-  
 473 OFF distance obtained by an analytic model (see Supplementary Information). Shaded area represents  
 474 standard deviation. (e) Resulting bimodal distribution of  $F_1/F_0$  predicted by the model (gray, Hartigan's dip  
 475 test,  $p < 10^{-5}$ ) is compared with the histogram of  $F_1/F_0$  in Figure 1(b) (red). (f) Spatial map and example 1-D  
 476 profile (along black arrows) of  $d_{ON-OFF}$  obtained from mosaic data in (a) (Top) and those of SI (Bottom).

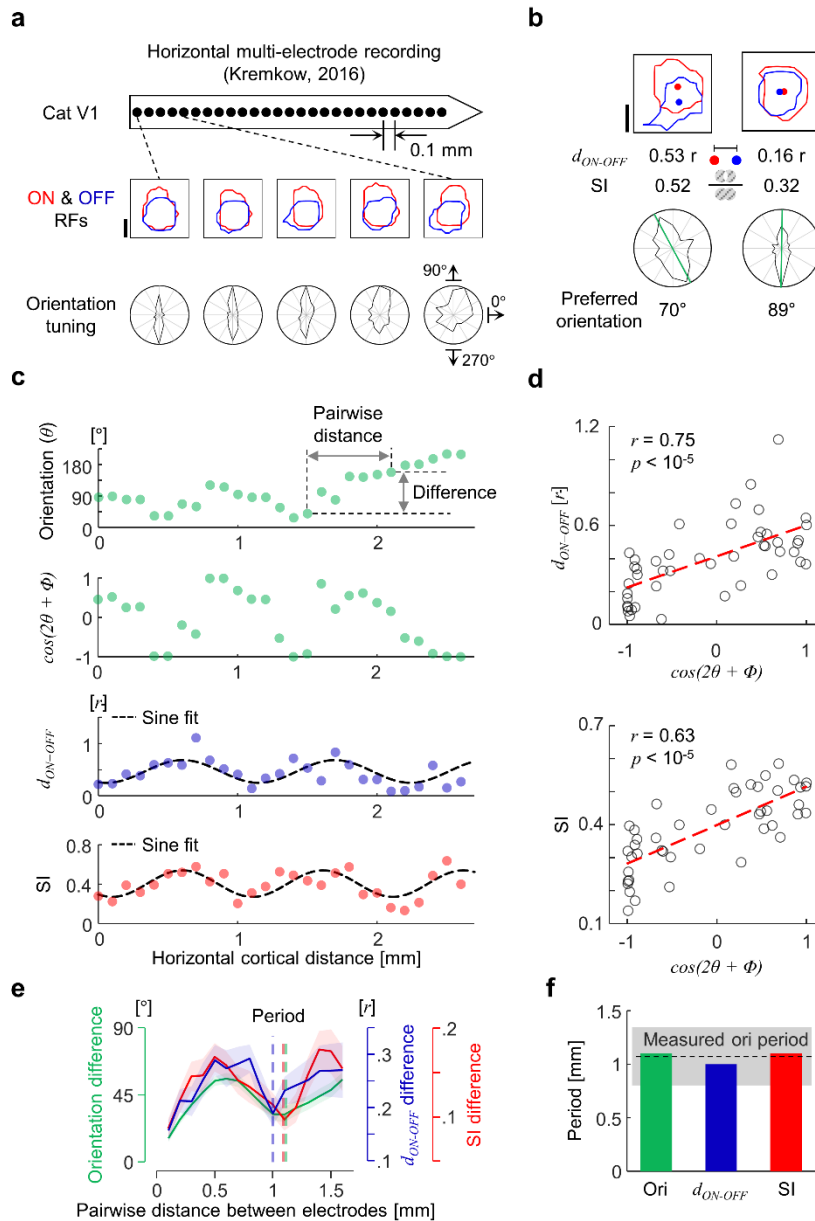

477 **Figure 3. Periodic spatial organization of simple/complex cells and the common period with**  
 478 **orientation preference in cat V1.**

479 (a) Illustration of multielectrode recording from Kremkow, 2016<sup>32</sup>. The contour of ON and OFF receptive  
 480 fields (measured with light and dark stimuli, respectively) is defined as a level of z-score = 1.5 for each  
 481 ON/OFF receptive field. Scale bar: average radius ( $r$ ) of the ON/OFF receptive field.

482 Polar plots represent a normalized response to drifting bars. (b) Example calculation of  $d_{ON-OFF}$  (distance  
483 between center of mass of ON/OFF sub-regions), SI, and preferred orientation. (c) Periodic spatial  
484 clustering of orientation preference (green, and its phase-adjusted cosine values, Supplementary Figure 3),  
485  $d_{ON-OFF}$  (blue), and SI (red). The Black dashed lines are sine fits for  $d_{ON-OFF}$  and SI. The  $d_{ON-OFF}$  fit:  $0.47 +$   
486  $0.22 \times \sin(2\pi x/\lambda - 1.92)$ ,  $\lambda = 1.1$  mm ( $R^2 = 0.41$ ,  $p = 3 \times 10^{-4}$ ). The SI fit:  $0.4 + 0.13 \times \sin(2\pi x/\lambda - 2.19)$ ,  $\lambda = 1.0$   
487 mm ( $R^2 = 0.52$ ,  $p = 2 \times 10^{-5}$ ). Phase difference between two fits:  $17^\circ$ . (d) Correlation between cosine of  
488 orientation ( $\cos(2\theta + \Phi)$ ) and  $d_{ON-OFF}$  (top), and SI (bottom) (2 penetrations,  $N = 52$  sites). (e) Average pairwise  
489 difference as a function of pairwise distance (averaged over 2 penetrations, averaged pairwise sample  $>$   
490 20 for each pairwise distance). Dashed vertical lines represent the period of each curve ( $\sim 1.1$  mm). (f)  
491 Comparison of the observed period of SI,  $d_{ON-OFF}$ , and orientation with reported values of the orientation  
492 map periods<sup>38</sup>.

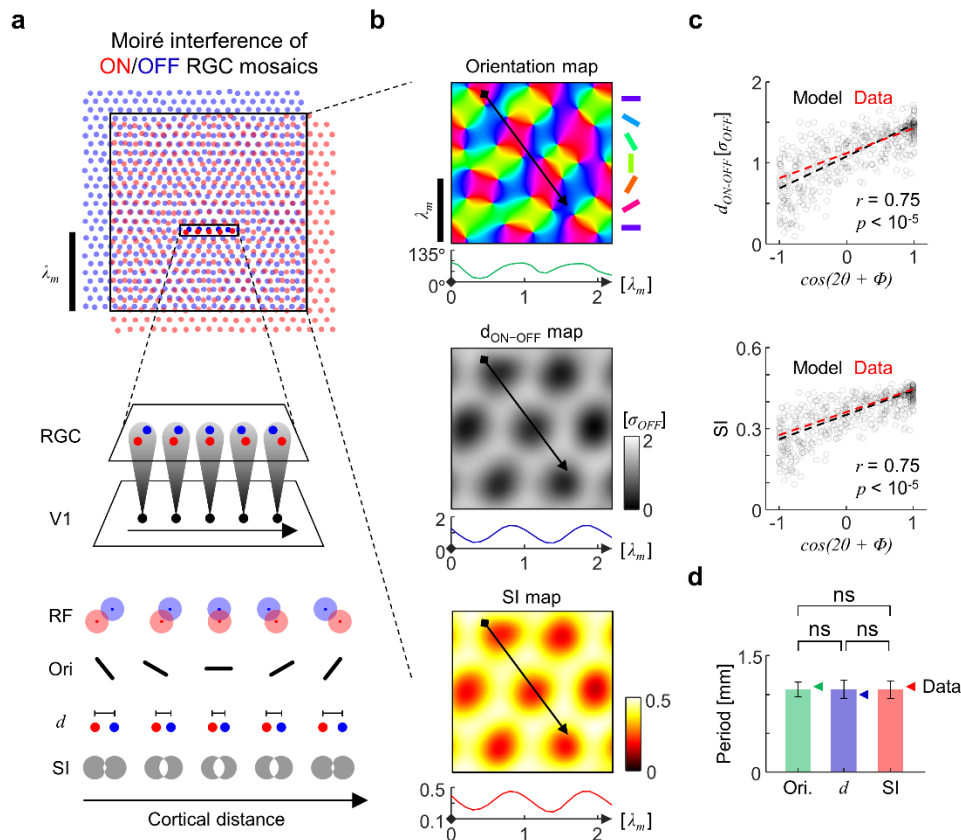

493 **Figure 4. Moiré interference of retinal mosaics predicts the periodic spatial organization of SI,  $d_{ON-OFF}$ , and orientation preference in V1.**  
 494

495 (a) ON (red) and OFF-center (blue) retinal ganglion cell receptive field mosaics are described as two noisy  
 496 hexagonal lattices with different periodicity and the same angle. The resulting hexagonal moiré interference  
 497 pattern has a characteristic period  $\lambda_m$ , and can be described by local ON-OFF dipoles. Five example ON-  
 498 OFF dipoles for ideal hexagonal moiré interference patterns occur in the region highlighted within a box  
 499 (middle). Constructed receptive fields SI,  $d_{ON-OFF}$ , and orientation preference of cortical neurons are  
 500 represented (bottom) (b) Pseudo color representation of the synthetic map of preferred orientation,  $d_{ON-OFF}$ ,  
 501 and SI (with example 1-D profiles along black arrow).  $\sigma_{OFF}$  represents the RF size of model OFF RGCs. (c)  
 502 Correlation between cosine of orientation ( $\cos(2\theta + \Phi)$ ) and  $d_{ON-OFF}$  (top), and SI (bottom) obtained from  
 503 diverse cortical penetrations on model maps (N = 100 penetrations). The data was rescaled to match the  
 504 mean and standard deviation of the model for comparison. (f) Consistent periods obtained from three maps  
 505 (one period value for each penetration for each map, N = 100 penetrations). ns: not significant (Wilcoxon  
 506 rank-sum test,  $p = 0.25, 0.83, 0.13$ , for SI - orientation, SI -  $d_{ON-OFF}$ ,  $d_{ON-OFF}$  - orientation, respectively).

507

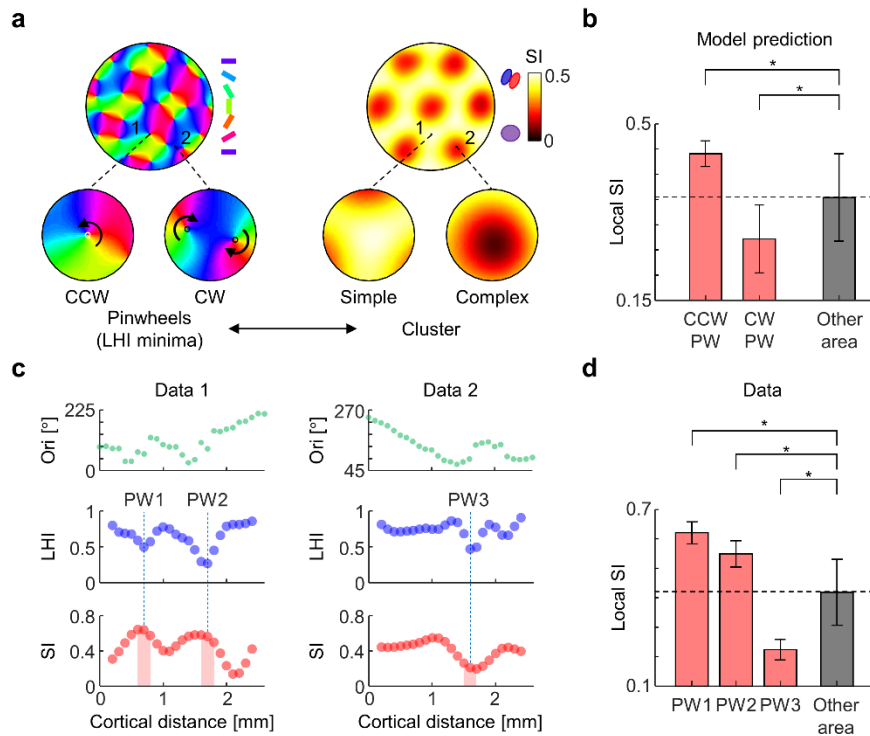

508 **Figure 5. Inferring local simple/complex properties with local information of orientation map**  
 509 **topography.**

510 (a) Comparison of topography of orientation map and SI map. (Left) Example pinwheels of the model  
 511 orientation map with opposite winding polarity, counterclockwise (CCW, marked as 1) and clockwise (CW,  
 512 marked as 2). (Right) Example SI of the model SI map at the corresponding locations (1 and 2). (b) Average  
 513 SI over circular area within 1/8 map period from the center of simple and complex pinwheels ( $n = 179$  simple  
 514 pinwheels,  $n = 214$  complex pinwheels) are significantly higher/lower than average SI over non-pinwheel  
 515 areas (Wilcoxon rank-sum test,  $*p < 0.0001$ ). (c) Orientation (green), LHI (blue) and SI (red, Gaussian-  
 516 smoothed) in cat V1 recording data in Fig. 3 (2 penetrations). Three local minima of LHI (dashed black lines,  
 517 putative pinwheels) and SI values near corresponding locations (red area) were identified. (d) Local SI near  
 518 pinwheel locations in (c). Average SI were calculated for 100  $\mu\text{m}$  range for each LHI minima. (Wilcoxon  
 519 rank-sum test,  $*p = 0.0065$ ,  $p = 0.027$ ,  $p = 0.016$  for PW1, PW2, and PW3, respectively).

520 **Supplementary Information**

521

522 **Model of the relationship between the membrane voltage and  $F_1/F_0$  ratio**

523 Following previous modeling studies<sup>20,25</sup>, the membrane voltage response of a V1 neuron to the drifting  
524 grating stimulus can be expressed as a sinusoidal function:

525 
$$V(t) = V_0 + V_1 \cos(2\pi ft + \phi)$$

526 where  $V_0$  represents the mean elevation of the membrane voltage and  $V_1$  represents the amplitude of the  
527 modulation,  $f$  is the temporal frequency of the drifting grating, and  $\phi$  is a constant phase term.

528 The relationship between the membrane voltage fluctuation and  $F_1/F_0$  was formulated using the  
529 following 3-parameter model:

530 
$$F(V) = g[(V - V_{th})_+]^p$$

531 where  $F$  is spike rate,  $p$  is an exponent and  $g$  is a gain factor. For the simplest case,  $p = 1$ , the analytic  
532 expression of  $F_1/F_0$  as a function of a variable  $\chi = (V_{th} - V_0)/V_1$  can be obtained as follows<sup>20</sup>.

533 
$$\frac{F_1}{F_0} = \frac{-\chi\sqrt{1-\chi^2} + \arccos(\chi)}{\sqrt{1-\chi^2} - \chi\arccos(\chi)} \quad \text{when } -1 \leq \chi \leq 1$$

534 
$$\frac{F_1}{F_0} = \frac{1}{\chi} \quad \text{when } \chi < -1$$

535 (eq. 1)

536 For a fixed value of  $V_{th}$ ,  $F_1/F_0$  can be described as a function of variable  $V_1/V_0$ .

537 The work of Mechler and Ringach<sup>20</sup> suggests that such a nonlinear relationship can induce the  
538 bimodal distribution of  $F_1/F_0$  even if the underlying distribution of  $\chi$  (or  $V_1/V_0$ ) is unimodal. Thus, simple  
539 ( $F_1/F_0 > 1$ ) and complex ( $F_1/F_0 < 0$ ) cells can be considered as a common type of cells. However, what factor  
540 in visual circuit can make the spectrum of such variables was not fully understood.

541

542 **Relationship between ON-OFF RGC afferent distance and  $F_1/F_0$  of V1 neuron**

543 Here, we advance the notion of the previous studies by suggesting that the distance between ON and OFF  
544 RGC afferents can give the source of the spectrum of  $F_1/F_0$ . An analytically tractable model that expresses  
545  $F_1/F_0$  as a function of the distance between ON and OFF RGC afferents are demonstrated in this section.



546 A previous electrophysiological study showed that the response measured by firing of retinal  
547 ganglion cells varies sinusoidally with the matched temporal frequency of the drifting grating stimulus with  
548 optimal spatial frequency<sup>52</sup>. Thus, we start by writing a firing rate of an RGC to the drifting grating stimulus  
549 as a sinusoidal function, which is denoted as  $r(t)$ .

$$550 \quad r(t) = r_0 + r_1 \cos(2\pi ft + \phi), \quad (r_0 > r_1 \text{ for } r(t) > 0)$$

551 where  $f$  is the temporal frequency of the drifting grating stimulus and  $\phi$  is the phase determined by the  
552 location of the RGC receptive field ( $x$ ).

553 Note that for a suitable choice of reference, one can write the phase as a variable of spatial position divided  
554 by the spatial frequency ( $\lambda$ ) of the drifting grating.

$$555 \quad \phi = 2\pi * x/\lambda$$

556 Here, the value of  $\lambda$  was determined to produce the maximum response for each RGC, where the RGC  
557 receptive field was modeled as in the main text and the response was calculated with a conventional linear  
558 nonlinear model<sup>53</sup>.

559 Summation of the response of ON and OFF RGCs at different positions (and thus different phases) yields  
560 the equation for the summed response,  $r_{sum}(t)$  (Supplementary Fig. 1a, 1<sup>st</sup> column).

$$561 \quad r_{sum}(t) = r_{on} + r_{off} = r_{0,on} + r_{1,on} \cos(2\pi ft + \phi_{on}) + r_{0,off} + r_{1,off} \cos(2\pi ft + \pi + \phi_{off})$$

562 The addition of  $\pi$  phase arises from the opposite polarity of ON/OFF response. By letting  $r_{0,on} = r_{0,off} =$   
563  $r_0$ ,  $r_{1,on} = r_{1,off} = r_1$ , and applying the trigonometric identity yields the simplified expression of the summed  
564 response.

$$565 \quad r_{sum}(t) = 2r_0 + 2r_1 \cos\left(\frac{\phi_{on}}{2} - \frac{\phi_{off}}{2} - \frac{\pi}{2}\right) \cos\left(2\pi ft + \frac{\phi_{on}}{2} + \frac{\phi_{off}}{2} + \frac{\pi}{2}\right)$$

566 The interpretation of the above equation is as follows. The first term,  $2r_0$ , is independent of the  
567 phase difference between ON and OFF RGCs. The amplitude of the second term, however, is dependent  
568 on the phase difference between ON and OFF RGCs ( $\phi_{on} - \phi_{off}$ ). When  $\phi_{on} = \phi_{off}$ , namely when ON  
569 and OFF receptive fields are completely overlapped, the amplitude of sinusoidal modulation becomes zero  
570 due to the  $\cos(0 + \frac{\pi}{2})$  term. As  $\phi_{on} - \phi_{off}$  increases, the amplitude of sinusoidal modulation increases  
571 and becomes maximum when  $\phi_{on} - \phi_{off} = \pi$ .

572 Next, the expression of the membrane voltage fluctuation suggested by Mechler and Ringach was  
573 linked with the above expression of  $r_{sum}(t)$  as follows (Supplementary Fig. 1a, second column).

574  $V_0 \sim \text{mean}(r_{\text{sum}}(t)) = A * 2r_0$

575  $V_1 \sim |1\text{st harmonic component of } r_{\text{sum}}(t)|^k = B * \left(2r_1 \cos\left(\frac{\phi_{\text{on}}}{2} - \frac{\phi_{\text{off}}}{2} - \frac{\pi}{2}\right)\right)^k$

576 where the exponent  $k$  was applied for the expansive relationship between input and membrane voltage  
 577 modulation that arises from nonlinear integration in dendrites<sup>54</sup>. This nonlinear relationship can generate a  
 578 skewed distribution of  $V_1/V_0$  as observed in cat<sup>25</sup> from a Gaussian-like distribution of ON-OFF distance  
 579 (Supplementary Figs. 1b, c).

580 This sinusoidal membrane voltage fluctuation is rectified to generate spike response modulation  
 581 (Supplementary Fig. 1a, third column). The expression that links the distance between ON/OFF afferent  
 582 and  $\chi$ , which determines the modulation ratio  $F_1/F_0$  becomes,

585 
$$\chi = \frac{V_{\text{th}} - V_0}{V_1} = \frac{V_{\text{th}} - 2Ar_0}{B \left(2r_1 \cos\left(\frac{\phi_{\text{on}} - \phi_{\text{off}} - \frac{\pi}{2}\right)\right)^k} = c_1 \left(\cos\left(\frac{\phi_{\text{on}} - \phi_{\text{off}} - \frac{\pi}{2}\right)\right)^{-k}$$

586 
$$= c_1 \left(\cos\left(\frac{2\pi}{\lambda}(x_{\text{ON}} - x_{\text{OFF}}) - \frac{\pi}{2}\right)\right)^{-k}$$

583 where  $c_1 = \frac{V_{\text{th}} - 2Ar_0}{B(2r_1)^k}$  is a constant. Substituting the  $\chi$  into eq. 1 and expressing the ON-OFF distance as  
 584  $x_{\text{ON}} - x_{\text{OFF}} = d$ , yields the analytic expression of  $F_1/F_0$  in terms of  $d$ .

587

588 
$$\frac{F_1}{F_0} = \frac{F_1}{F_0}(d)$$

589 
$$= \frac{-c_1 \left(\cos\left(\frac{2\pi}{\lambda}d - \frac{\pi}{2}\right)\right)^{-k} \sqrt{1 - c_1^2 \left(\cos\left(\frac{2\pi}{\lambda}d - \frac{\pi}{2}\right)\right)^{-2k}} + \arccos\left(-c_1 \left(\cos\left(\frac{2\pi}{\lambda}d - \frac{\pi}{2}\right)\right)^{-k}\right)}{\sqrt{1 - c_1^2 \left(\cos\left(\frac{2\pi}{\lambda}d - \frac{\pi}{2}\right)\right)^{-2k}} + c_1 \left(\cos\left(\frac{2\pi}{\lambda}d - \frac{\pi}{2}\right)\right)^{-k} \arccos\left(-c_1 \left(\cos\left(\frac{2\pi}{\lambda}d - \frac{\pi}{2}\right)\right)^{-k}\right)}$$

590 when  $-1 \leq \chi \leq 1$ ,

591 
$$= \frac{1}{-c_1 \left(\cos\left(\frac{2\pi}{\lambda}d - \frac{\pi}{2}\right)\right)^{-k}} \quad \text{when } \chi < -1$$

592 From this expression, the distribution of  $F_1/F_0$  can be calculated as in the Fig. 2d of the main text. In our  
 593 demonstration,  $k = 3$ ,  $c_1 \sim N(\mu, \sigma^2) = N(-0.04, 0.08^2)$  were used ( $N$  represents the normal distribution).

594

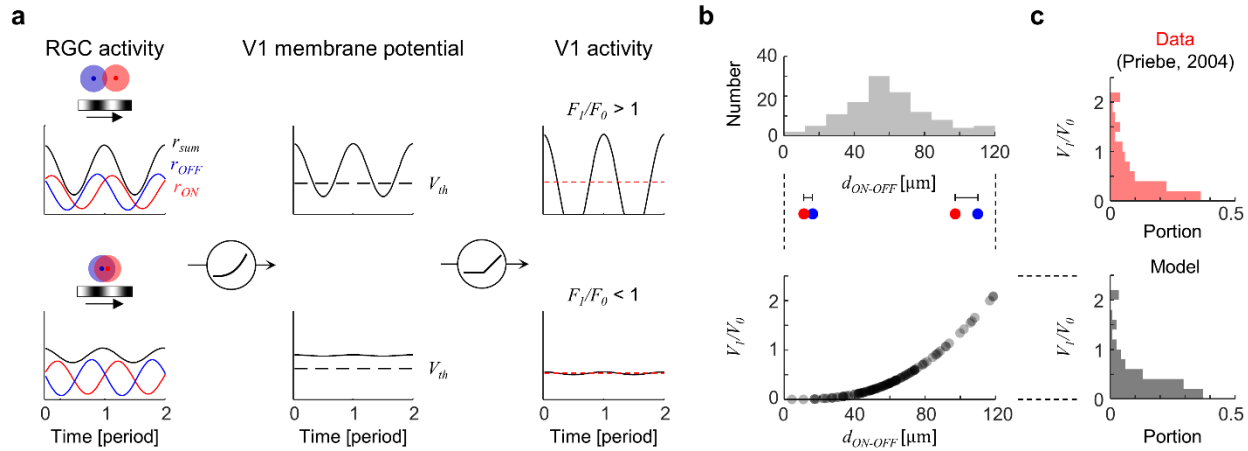

595 **Supplementary Figure 1.** Relationship between  $d_{ON-OFF}$  and response modulation of V1 neuron to drifting  
 596 grating.

597 (a) Illustration of responses of RGCs and V1 neurons to the drifting grating stimulus following the model  
 598 described in Supplementary Information. Dashed black line ( $V_{th}$ ) represents spike threshold. Dashed red  
 599 line represents mean response. (b) Distribution of  $d_{ON-OFF}$  shown in main text (top) and model relationship  
 600 between  $V_1/V_0$  and  $d_{ON-OFF}$  (bottom). (c) Skewed distribution of  $V_1/V_0$  in both top (adapted from Priebe, 2004<sup>25</sup>)  
 601 and model (bottom,  $B(2r_1)^k / 2Ar_0 = 7$ : constant that linearly controls the scale of  $V_1/V_0$ ).

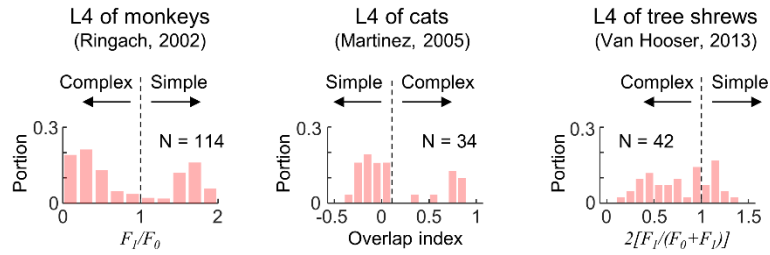

602 **Supplementary Figure 2.** Distribution of simple and complex cells in monkeys<sup>16</sup>, cats<sup>9</sup>, and tree  
603 shrews<sup>17</sup>.

604 Simple and complex cells coexist in the earliest stage of visual cortex, layer 4, in monkeys, cats, and tree  
605 shrews.  $F_1/F_0$  and  $2[F_1/(F_0+F_1)]$  represent the degree of response modulation to sinusoidal drifting  
606 gratings, and the overlap index measures the degree of overlap between ON and OFF subregions of the  
607 receptive fields.

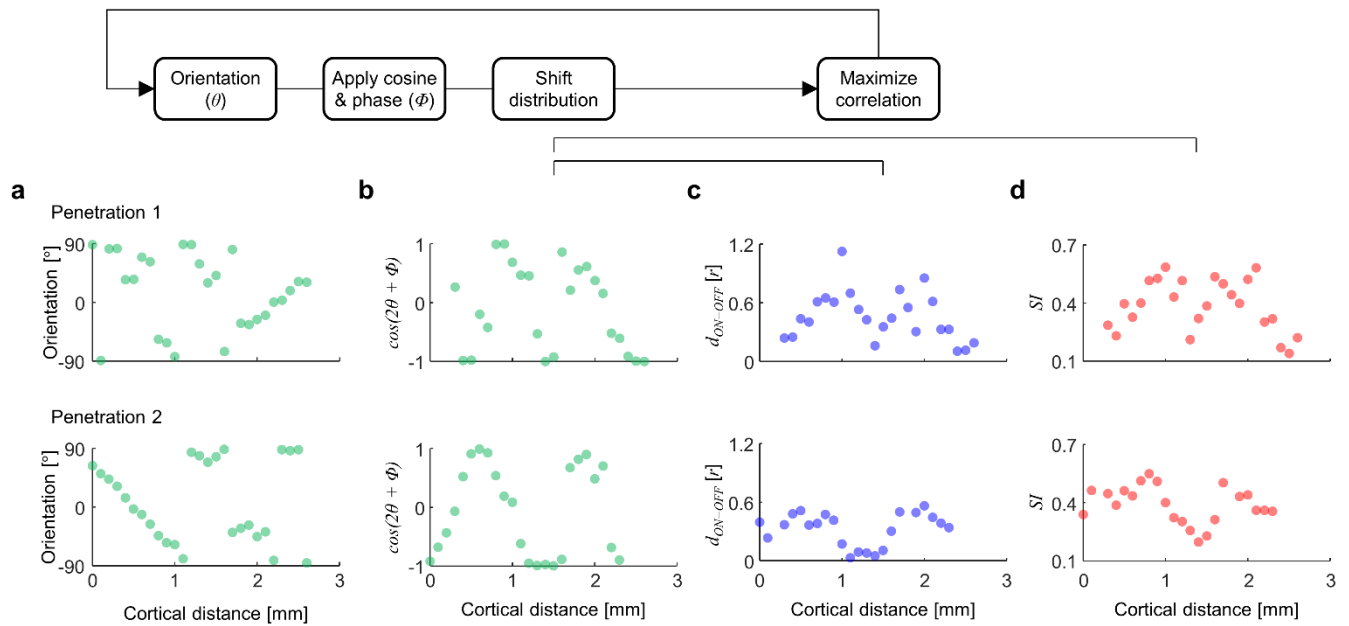

608 **Supplementary Figure 3.** Quantifying correlation between orientation and SI (or  $d_{ON-OFF}$ ).

609 (a) Spatial profiles of orientation preference ( $\theta$ ). (b) Transformed and distance-shifted profiles of  $\cos(2\theta + \Phi)$ .  
 610 (c) Shifted profiles of  $d_{ON-OFF}$  and SI. The values of  $\Phi$  ( $0-360^\circ$ ) and shifting lag ( $-0.5-0.5$  mm) were  
 611 determined to maximize the correlation between (b) and (d). In position-shuffled control (shuffle position  
 612 information of SI), the probability of obtaining as high a correlation value as in the data was significantly low  
 613 ( $p = 0.005$ ).

614

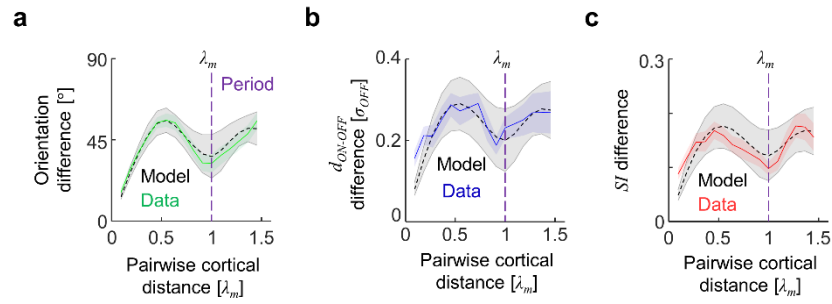

615 **Supplementary Figure 4.** Common periods for orientation,  $d_{ON-OFF}$ , and SI in model and data.

616 Pairwise differences of (a) Orientation (b)  $d_{ON-OFF}$ , and (c) SI for the simulated model maps. The common  
617 period  $\lambda_m$  is denoted as a purple dashed line. Shaded gray areas represent the standard deviation obtained  
618 from different cortical penetrations. For (b) and (c), the curves for data and model were normalized to match  
619 the maximum value.
